# Supplementary material for: Profiling ubiquitin signalling with UBIMAX reveals DNA damage- and SCFβ-Trcp1-dependent ubiquitylation of the actin-organizing protein Dbn1
Source: PubMed Central journal article supplement (PMC10721886; doi:10.1038/s41467-023-43873-0), 2023-12-14
Supplement: 41467_2023_43873_MOESM1_ESM.pdf [file 41467_2023_43873_MOESM1_ESM.pdf]

Supplementary Information for

**Profiling ubiquitin signalling with UBIMAX reveals DNA damage- and SCF<sup>β-TRCP1</sup>-  
dependent ubiquitylation of the actin-organizing protein Dbn1**

Camilla S. Colding-Christensen<sup>1†</sup>, Ellen S. Kakulidis<sup>1†</sup>, Javier Arroyo-Gomez<sup>1</sup>, Ivo A. Hendriks<sup>1</sup>, Connor  
Arkinson<sup>2,3</sup>, Zita Fábíán<sup>1</sup>, Agnieszka Gambus<sup>2</sup>, Niels Mailand<sup>1</sup>, Julien P. Duxin<sup>1\*</sup>, Michael L. Nielsen<sup>1\*</sup>

\*Correspondence and requests for materials should be addressed to J.P.D. (email: [julien.duxin@cpr.ku.dk](mailto:julien.duxin@cpr.ku.dk))  
or to M.L.N. (email: [michael.lund.nielsen@cpr.ku.dk](mailto:michael.lund.nielsen@cpr.ku.dk))

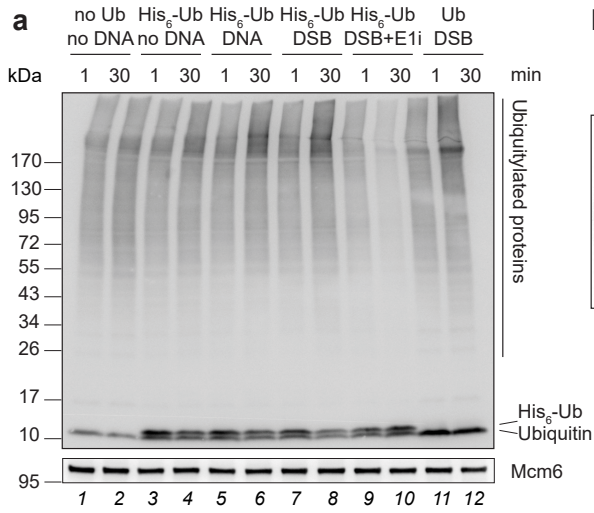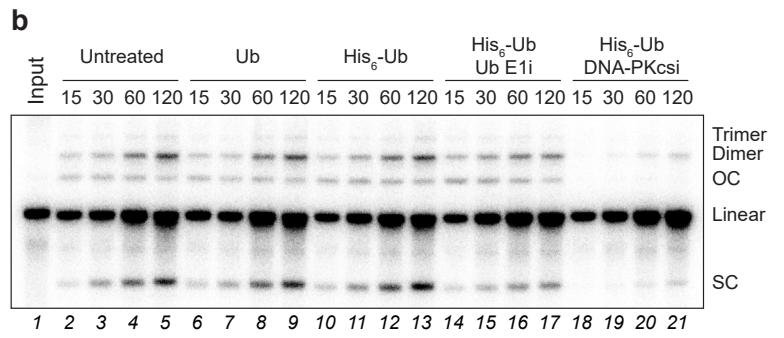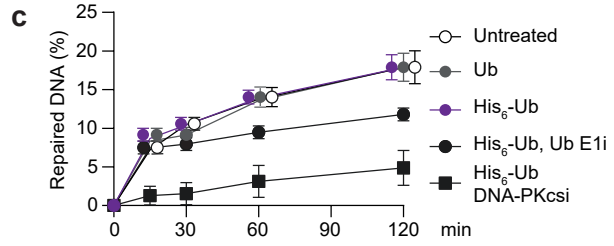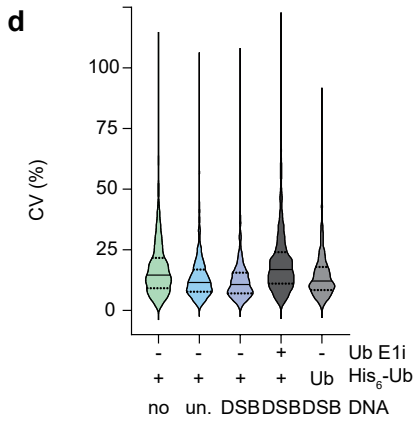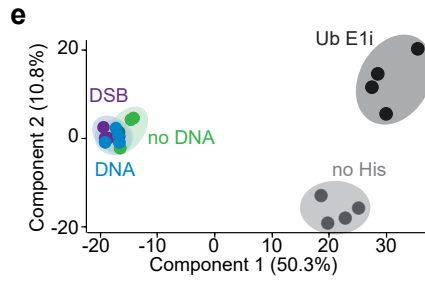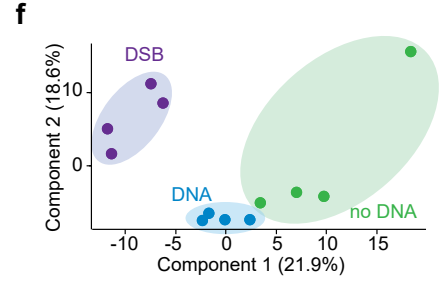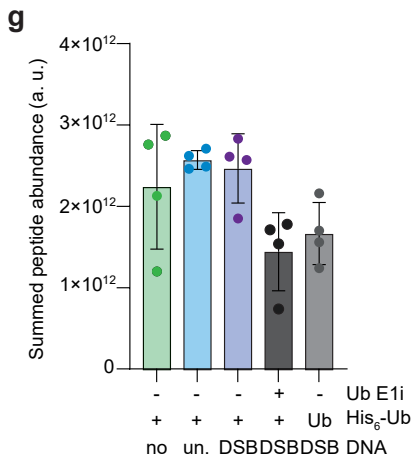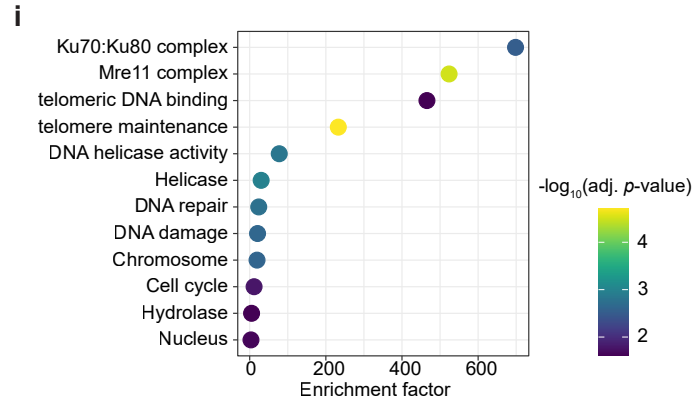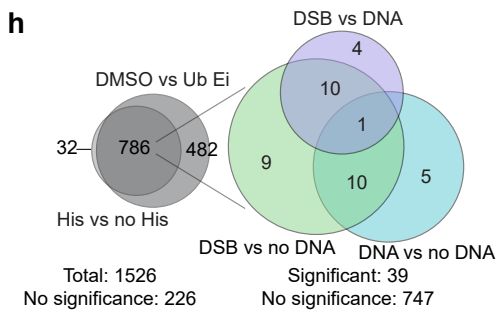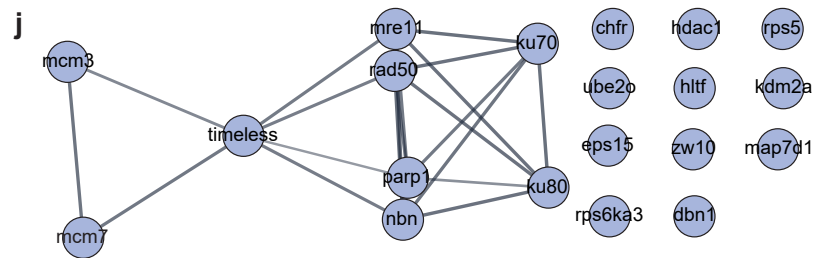

**Supplementary Fig. 1. UBIMAX efficiently and specifically detects ubiquitin-conjugated proteins in response to DSBs. Related to Fig. 1.**

**a.** Western blot analysis of ubiquitin from the experiment in Fig. 1c. **b.** Extracts were untreated or supplemented with ubiquitin E1- (“Ub E1i”) or DNA-PKcs inhibitor (“DNA-PKcsi”) prior to addition of untagged ubiquitin (“Ub”) or His<sub>6</sub>-Ubiquitin (“His<sub>6</sub>-Ub”) and radioactively labelled, linearized plasmid DNA. DNA was recovered and analysed by agarose gel electrophoresis. Input was radioactively labelled, linearized plasmid DNA alone. SC; supercoiled, OC; open circular. **c.** Quantification of repair products from experiments representatively shown in (b). Error bars represent standard error of the mean. n=4 independent reaction replicates, except for the DNA-PKcsi condition (n=2). **d.** Percent coefficients of variation (CV) calculated across quadruplicate independent reaction replicates of the experiment outlined in Fig. 1d. Full and dotted lines indicate median CVs and 25% and 75% quantiles. no, no DNA; un., undamaged plasmid DNA; DSB, linearized plasmid DNA. **e-f.** Principal component analysis of all samples (**e**) or ubiquitin target-enriched samples (**f**). The principal components displayed represent the greatest degree of variability observed. Eigenvalues indicated on the axes. **g.** Mean summed peptide abundance. Error bars represent standard deviations. a.u., arbitrary units. **h.** Proportionally scaled Venn diagrams showing the overlap of ubiquitylated proteins significantly enriched over controls, presence *versus* absence of His<sub>6</sub>-ubiquitin (“His vs no His”) and absence *versus* presence of ubiquitin E1 inhibitor (“DMSO vs Ub E1i”) (left), and the subset of ubiquitylated proteins significantly enriched over controls changing significantly with the presence *versus* absence of undamaged- (“DNA vs no DNA”) or linearized plasmid DNA (“DSB vs no DNA”) or undamaged- *versus* linearized plasmid DNA (“DSB vs DNA”) (right). Gene name annotated isoforms were excluded. Significant enrichments for left and right Venn diagrams were determined by one- and two-tailed Student’s *t*-testing, with permutation-based FDR-control,  $s_0=0.1$  and 2500 rounds of randomization, to ensure an  $FDR \leq 0.05$ . **i.** Enrichment analysis of GO terms and Keywords significantly represented ( $FDR \leq 0.05$ ) in the “DSB-induced” cluster in Fig. 1h. Significance was determined via two-tailed Fisher’s Exact testing with Benjamini–Hochberg correction for multiple hypotheses testing. **j.** STRING network analysis of ubiquitylated proteins in the “DSB-induced” cluster in Fig. 1h. Source data are provided as a Source Data file.



**Supplementary Fig. 2. UBIMAX identifies DNA damage specific ubiquitylation events. Related to Fig. 2.**

**a.** Extract reactions were performed as described for Fig. 2a, except either in the absence or presence of His<sub>6</sub>-ubiquitin (His<sub>6</sub>-Ub). Samples were analysed by western blot at 1 or 30 minutes after reaction initiation. Source data are provided as a Source Data file. **b.** Venn diagram showing the overlap of ubiquitylated proteins detected by UBIMAX as significantly enriched in response to linearized plasmid DNA (“DSB”), plasmids carrying the M.HpaII protein crosslinked at a single-stranded DNA gap (“ssDNA-DPC”), or plasmids carrying the Flp protein crosslinked at a single-strand break (“SSB-DPC”), all compared to undamaged plasmid DNA. Only proteins significantly enriched, as determined by two-tailed Student’s *t*-testing, with permutation-based FDR-control, with  $\alpha=0.1$  and 2500 rounds of randomization, to ensure an  $FDR \leq 0.01$ , are shown.  $n=4$  and  $n=3$  independent reaction replicates for the DSB- and DPC-UBIMAX experiments, respectively.

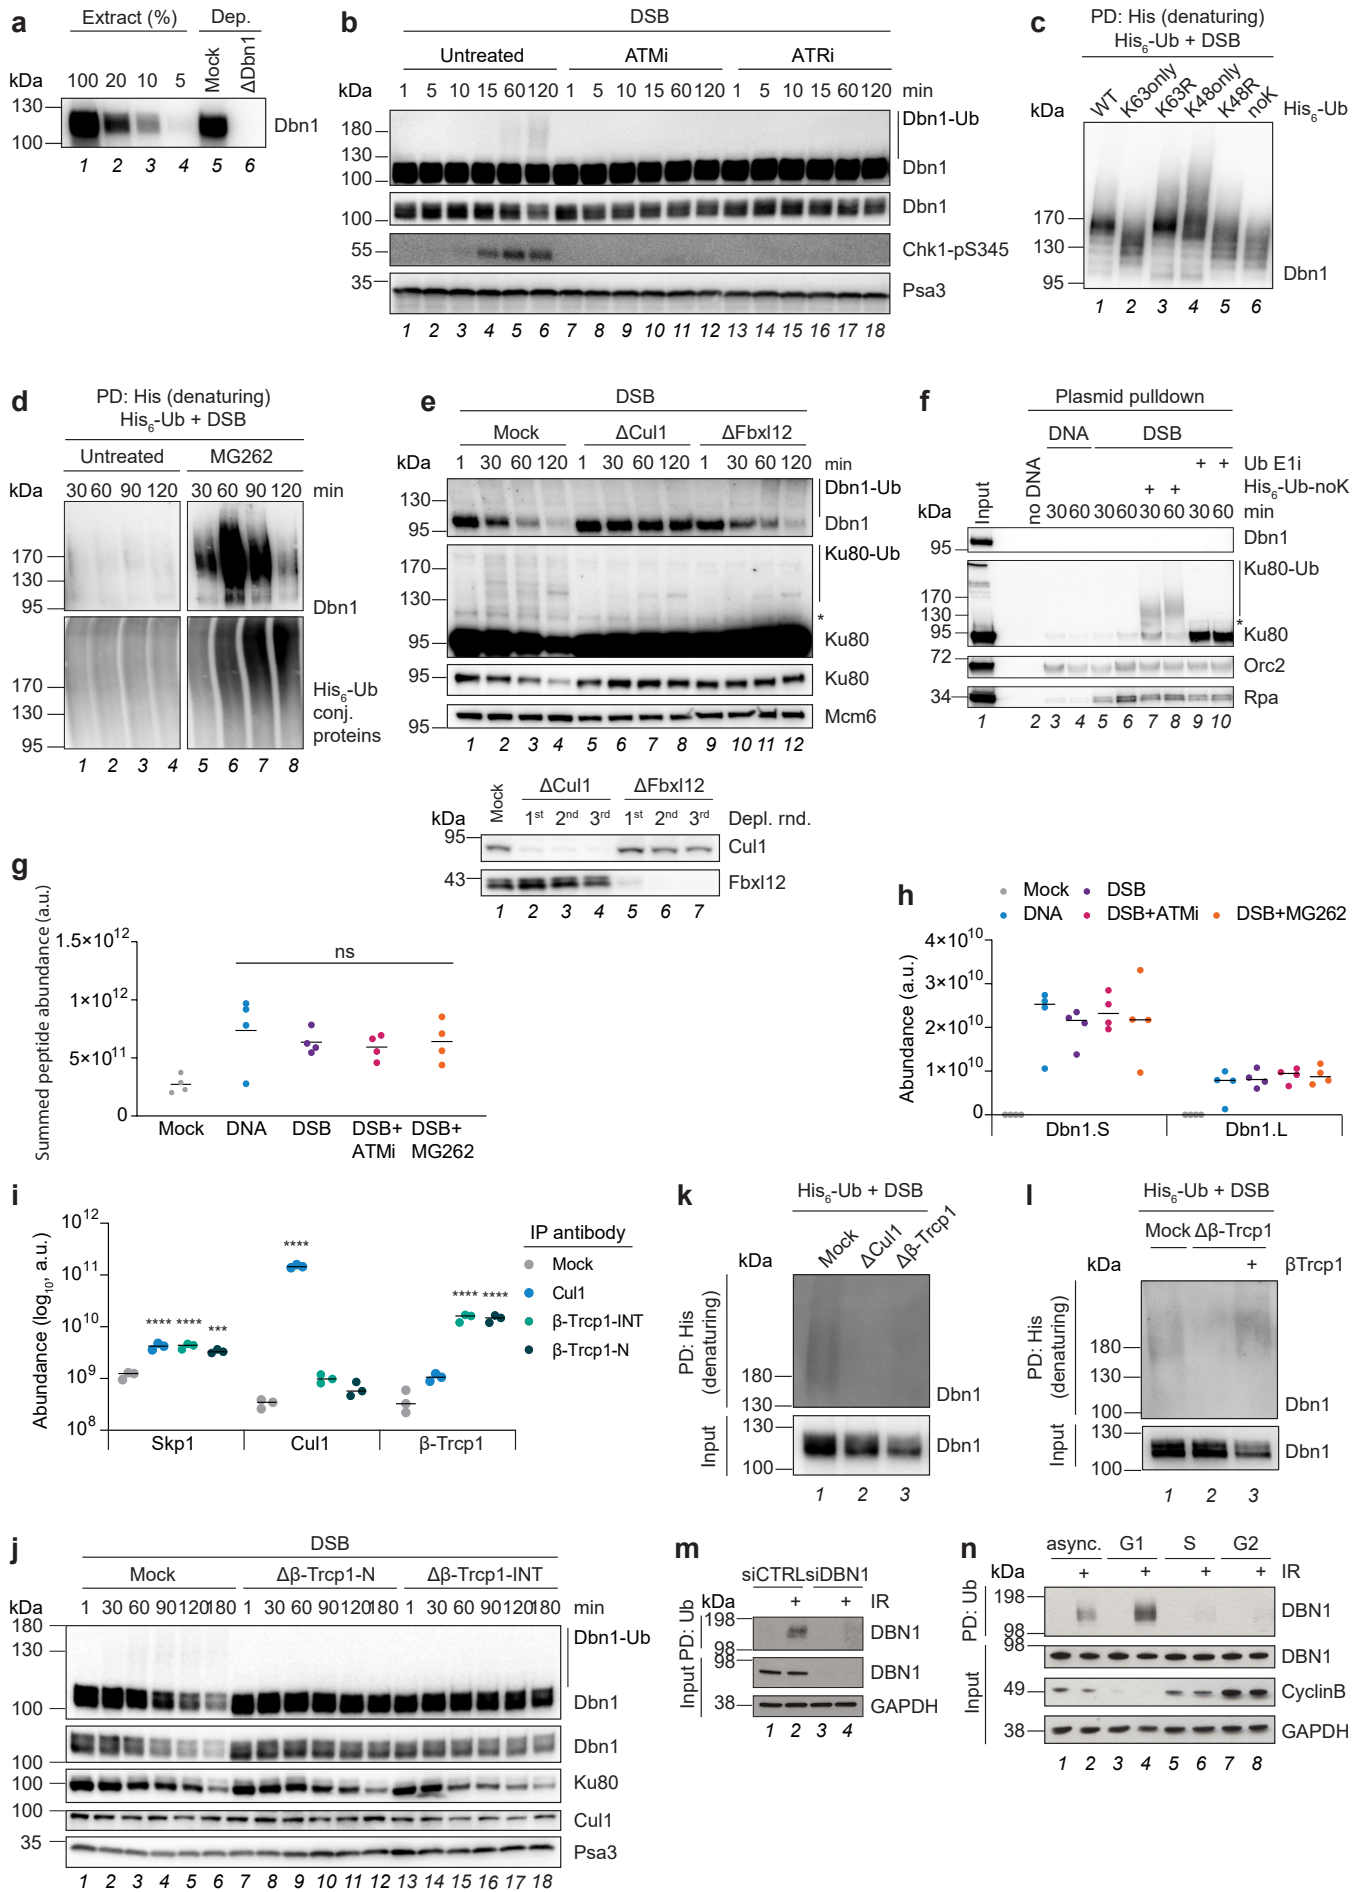

**Supplementary Fig. 3. DDR-dependent and SCF <sup>$\beta$ -Trcp1</sup>-mediated K48-linked ubiquitylation of Dbn1 results in proteasomal degradation. Related to Fig. 3.**

**a.** Immunodepletion control for Fig. 3a. Dep., depletion. **b.** Western blot analysis of extracts untreated or supplemented with ATM- or ATR inhibitor (“ATMi”, “ATRI”) prior to addition of linearized plasmid DNA (“DSB”). **c.** Western blot analysis of denaturing His-pulldowns from extracts supplemented with His<sub>6</sub>-Ubiquitin (“His<sub>6</sub>-Ub”) WT or indicated mutants prior to addition of linearized plasmid DNA for 30 minutes. PD, pulldown. **d.** Extracts were untreated or supplemented with proteasome inhibitor (MG262) and His<sub>6</sub>-ubiquitin before addition of linearized plasmid DNA and processed as in c. All samples were included on the same membrane and the same exposure is shown. **e.** Western blot analysis of mock-, Cul1- and Fbxl12-immunodepleted extracts upon addition of linearized plasmid DNA. Immunodepletion controls shown below. Depl. rnd, immunodepletion round. \*unspecific band. **f.** Western blot analysis of plasmid pulldowns from extracts untreated or supplemented with His<sub>6</sub>-ubiquitin-noK (“His<sub>6</sub>-Ub-noK”) or ubiquitin E1 inhibitor (“Ub E1i”) before addition of undamaged- (“DNA”) or linearized (“DSB”) plasmid DNA. Input was collected before initiation of reaction and unsupplemented extract (“no DNA”) was used for the pulldown control. \*unspecific band. **g.** Summed peptide abundances of the Dbn1 IP-MS experiment outlined in Fig. 3e. Horizontal lines indicate the median. Error bars represent standard deviations. n=4 independent reaction replicates. Significance was determined by one-way ANOVA with Tukey's multiple comparisons test for all pairwise comparisons. a.u., arbitrary units; ns, not significant. **h.** Abundance of the Dbn1.S and Dbn1.L *Xenopus laevis* isoforms. Horizontal lines indicate the median. a.u., arbitrary units. **i.** Abundance of Skp1, Cul1, and  $\beta$ -Trcp1 from mock-, Cul1-,  $\beta$ -Trcp1-INT-, or  $\beta$ -Trcp1-N-immunoprecipitations (IP) of unstimulated extracts analysed by MS. Horizontal lines indicate the median. Significance was determined by one-way ANOVA with Dunnett's multiple comparisons test for all immunoprecipitations compared to mock, with all indicated comparisons of  $p$ -value<0.0001 except for Skp1  $\beta$ -Trcp1-N versus mock ( $p$ -value=0.0007). n=3 independent extract replicates. a.u., arbitrary units. **j.** Western blot analysis of mock-,  $\beta$ -Trcp1-INT-, or  $\beta$ -Trcp1-N-immunodepleted extracts upon addition of linearized plasmid DNA. **k.** Western blot analysis of denaturing His-pulldowns from mock-, Cul1-, or  $\beta$ -Trcp1-immunodepleted extracts supplemented with His<sub>6</sub>-ubiquitin and linearized plasmid DNA. Input and pulldown samples were collected prior to and 60 minutes after addition of DNA, respectively. PD, pulldown. **l.**  $\beta$ -Trcp1 protein or buffer was added to mock- or  $\beta$ -Trcp1-immunodepleted extracts prior to His<sub>6</sub>-ubiquitin and linearized plasmid DNA. Input and pulldown samples collected and processed as described in (k). **m.** Western blot analysis of whole cell extracts (“input”) or ubiquitin pulldowns of siCTRL- or siDBN1-transfected cells 30 min after exposure or not to 10 Gy ionizing radiation (IR). PD, pulldown; Ub, ubiquitin. **n.** Cells were synchronized and released for various times to obtain G1, S or G2 populations before exposure or not to 10 Gy IR and processed as described in (m). Source data are provided as a Source Data file.

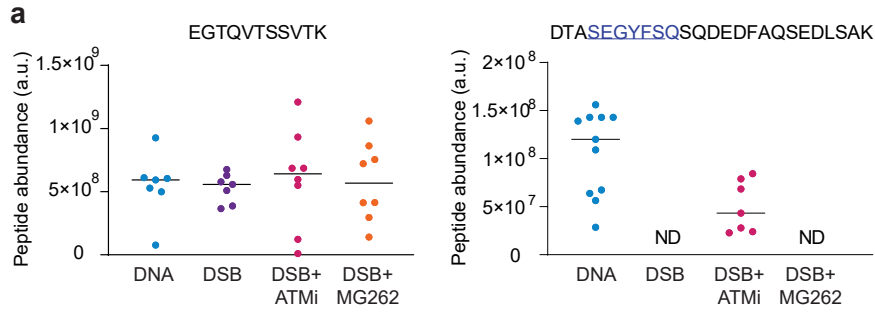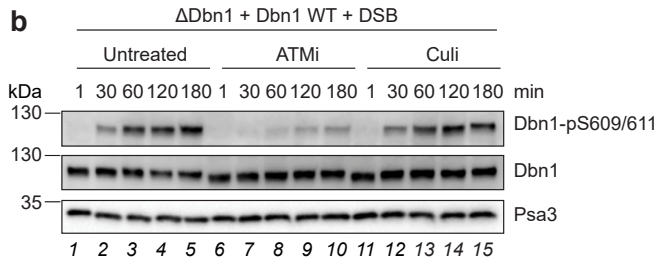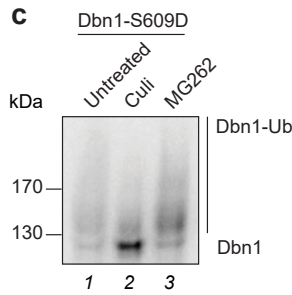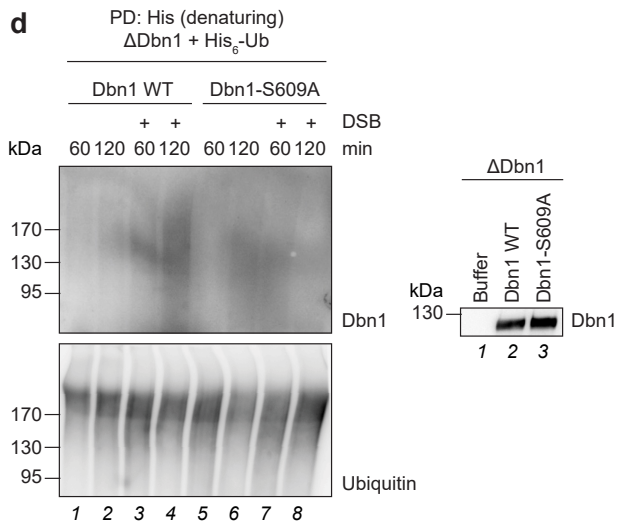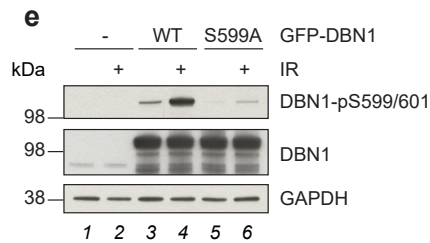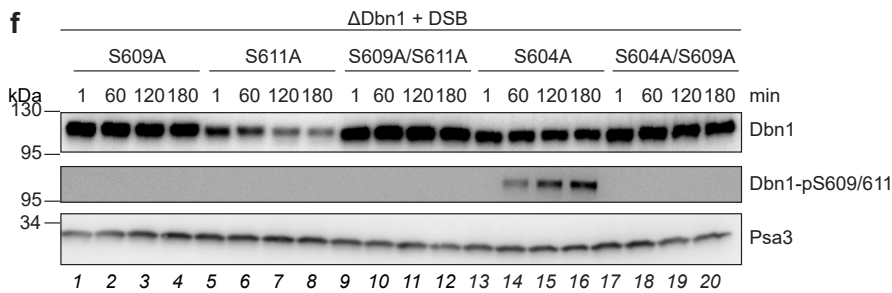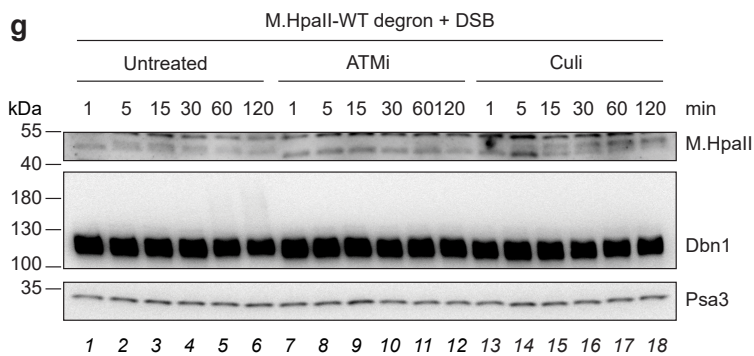



**Supplementary Fig. 4. A variant  $\beta$ -Trcp1 degron is necessary and sufficient for inducing Dbn1 and general protein degradation in response to DSBs. Related to Fig. 4.**

**a.** Abundance of the indicated tryptic Dbn1 peptides across the conditions of the Dbn1 IP-MS experiment outlined in Fig. 3e. Horizontal lines indicate the median. n=4 independent reaction replicates. a.u., arbitrary units; ND, not detected. **b.** Western blot analysis of Dbn1-immunodepleted extracts untreated or supplemented with ATM inhibitor (“ATMi”) or neddylation E1 inhibitor (“Culi”) prior to addition of Dbn1 protein and linearized plasmid DNA (“DSB”). **c.** Western blot analysis of rabbit reticulocyte lysates (*in vitro* translation system) either untreated or supplemented with neddylation E1 inhibitor or proteasome inhibitor (MG262) before allowing protein translation for 90 minutes initiated by addition of a plasmid encoding Dbn1-S609D. **d.** WT or Dbn1-S609A protein was added to Dbn1-immunodepleted extracts prior to His<sub>6</sub>-ubiquitin (His<sub>6</sub>-Ub) and undamaged- or linearized plasmid DNA (“DSB”). Samples were collected prior to addition of linearized plasmid DNA for Dbn1-immunodepletion and protein add-back controls (right) and 60 minutes after for denaturing His-pulldown (left). Samples were analysed by western blot. PD, pulldown. **e.** Cells were transiently transfected with control plasmid (“-”) or plasmids encoding GFP-DBN1 (“WT”) or GFP-DBN1-S599A (“S599A”) for 24 hours before being subjected or not to 10 Gy ionizing radiation (IR). Lysates were harvested 30 minutes after irradiation and analysed by western blot. **f.** Western blot analysis of Dbn1-immunodepleted extracts supplemented with the indicated recombinant Dbn1 mutants prior to addition of linearized plasmid DNA. **g.** Western blot analysis of extracts supplemented with M.HpaII protein tagged with the variant  $\beta$ -Trcp1 degron before addition of buffer, ATM-, or neddylation E1 inhibitor and linearized plasmid DNA. Source data are provided as a Source Data file.
